# Supplementary material for: Expanding the Chemical Space of Aryloxy-naphthoquinones as Potential Anti-chagasic Agents: Synthesis and Trypanosomicidal Activity
Source: Research Square preprint supplement (doi:10.21203/rs.3.rs-756093/v1), 2021-08-04
Supplement: Supplementary file 1 [file 783040bceefe574c63287086.docx]

**Supporting information**

Expanding the chemical space of aryloxy-naphthoquinones as potential anti-Chagasic agents: Synthesis and trypanosomicidal activity

Nohemí A. Becerra1 ● Christian Espinosa-Bustos2 ● Karina Vázquez1 ● Gildardo Rivera3 ● Margot Paulino4 ● Jorge Cantero5 ● Benjamín Nogueda6 ● Fabiola Chacón-Vargas7 ● Uziel Castillo-Velazquez8 ● Ana F. Elizondo Rodríguez8 ● Sofía Toledo2 ● Adriana Moreno-Rodríguez9 ● Mario Aranda2 ● Cristian O. Salas10

1. Facultad de Medicina Veterinaria y Zootecnia, Cuerpo Académico de Epidemiología Veterinaria, Universidad Autónoma de Nuevo León, General Escobedo, Nuevo León, C.P. 66050, México
2. Departamento de Farmacia, Facultad de Química y de Farmacia, Pontificia Universidad Católica de Chile, Santiago, 702843, Chile
3. Laboratorio de Biotecnología Farmacéutica, Centro de Biotecnología Genómica, Instituto Politécnico Nacional, Blvrd del Maestro SN, Narciso Mendoza, 88710 Reynosa, México
4. Departamento DETEMA, Facultad de Química, Universidad de la República, Av. Gral. Flores 2124, 11800 Montevideo, Uruguay
5. Facultad de Ingeniería Agronómica, Dirección de Investigación, Universidad Nacional del Este, Ciudad del Este, Paraguay
6. Escuela Nacional de Ciencias Biológicas, Instituto Politécnico Nacional, Prolongación de Carpio y Plan de Ayala S/N Col. Santo Tomás 11340, Ciudad de México, México
7. Facultad de Ciencias Químicas, Universidad Autónoma de Chihuahua, Circuito Universitario S/N. Campus Universitario II, 31125, Chihuahua, México
8. Cuerpo académico de Zoonosis y Enfermedades Emergentes, Facultad de Medicina Veterinaria y Zootecnia, UANL, General Escobedo, N.L., C.P. 66050, México
9. Facultad de Ciencias Químicas, Universidad Autónoma Benito Juárez de Oaxaca, Oaxaca 68120, México
10. Departamento de Química Orgánica, Facultad de Química y de Farmacia, Pontificia Universidad Católica de Chile, Santiago, 702843, Chile.

✉ Karina Vázquez

[kwvazque@gmail.com](mailto:kwvazque@gmail.com)

✉ Cristian O. Salas

[cosalas@uc.cl](mailto:cosalas@uc.cl)

1H NMR for compound **3a**

13C NMR for compound **3a**

Mass spectra for compound **3a**

1H NMR for compound **3b**

13C NMR for compound **3b**

Mass spectra for compound **3b**

1H NMR for compound **3c**

13C NMR for compound **3c**

Mass spectra for compound **3c**

1H NMR for compound **3d**

13C NMR for compound **3d**

Mass spectra for compound **3d**

1H NMR for compound **3e**

13C NMR for compound **3e**

Mass spectra for compound **3e**

1H NMR for compound **3f**

13C NMR for compound **3f**

Mass spectra for compound **3f**

1H NMR for compound **3g**

13C NMR for compound **3g**

Mass spectra for compound **3g**

1H NMR for compound **3h**

13C NMR for compound **3h**

Mass spectra for compound **3h**

1H NMR for compound **3i**

13C NMR for compound **3i**

Mass spectra for compound **3i**
